# Supplementary material for: Adalimumab long-term safety: infections, vaccination response and pregnancy outcomes in patients with rheumatoid arthritis
Source: PubMed Central journal article supplement — Ann Rheum Dis. 2016 Jun 23;76(2):414–7. doi: 10.1136/annrheumdis-2016-209322 (PMC5284339; doi:10.1136/annrheumdis-2016-209322), 2016-06-23

**Table S1.** Patient exposure and baseline characteristics in rheumatoid arthritis patients treated with adalimumab (N = 15,152)

| <b>Parameter</b>                  |          |
|-----------------------------------|----------|
| Exposure (patient-years)          | 24,810.4 |
| >2 years of exposure (%)          | 16.5     |
| >5 years of exposure (%)          | 10.9     |
| Mean Age (years)                  | 53.5     |
| Female (%)                        | 78.8     |
| White (%)                         | 86.5     |
| Mean Disease duration* (years)    | 9.1      |
| Concomitant† cs DMARDs‡ (%)       | 64.9     |
| MTX (%)                           | 55.7     |
| Concomitant systemic steroids (%) | 64.0     |

\* Data available for N=15,002 only.

† Concomitant use at baseline.

‡ csDMARD: conventional synthetic disease-modifying antirheumatic drug; MTX: methotrexate.

**Figure S1.** Mean change from baseline in total cholesterol, low-density lipoprotein (LDL) cholesterol, and high-density lipoprotein (HDL) cholesterol serum concentrations after six months of adalimumab treatment in early rheumatoid arthritis patients. Cholesterol concentrations in SI units. \* $P < 0.05$  for the comparison adalimumab-plus-methotrexate (dark-shaded bars) versus methotrexate-monotherapy (light-shaded bars).

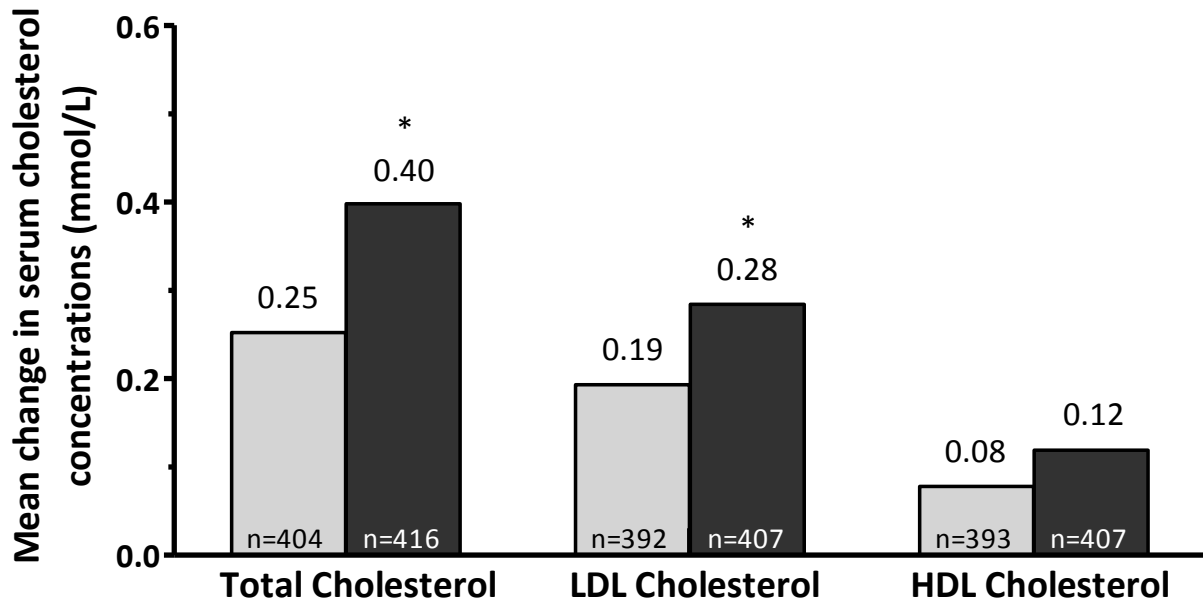

**Figure S2.** Frequency of patients experiencing influenza-related adverse events with and without influenza vaccination. AE, adverse event.

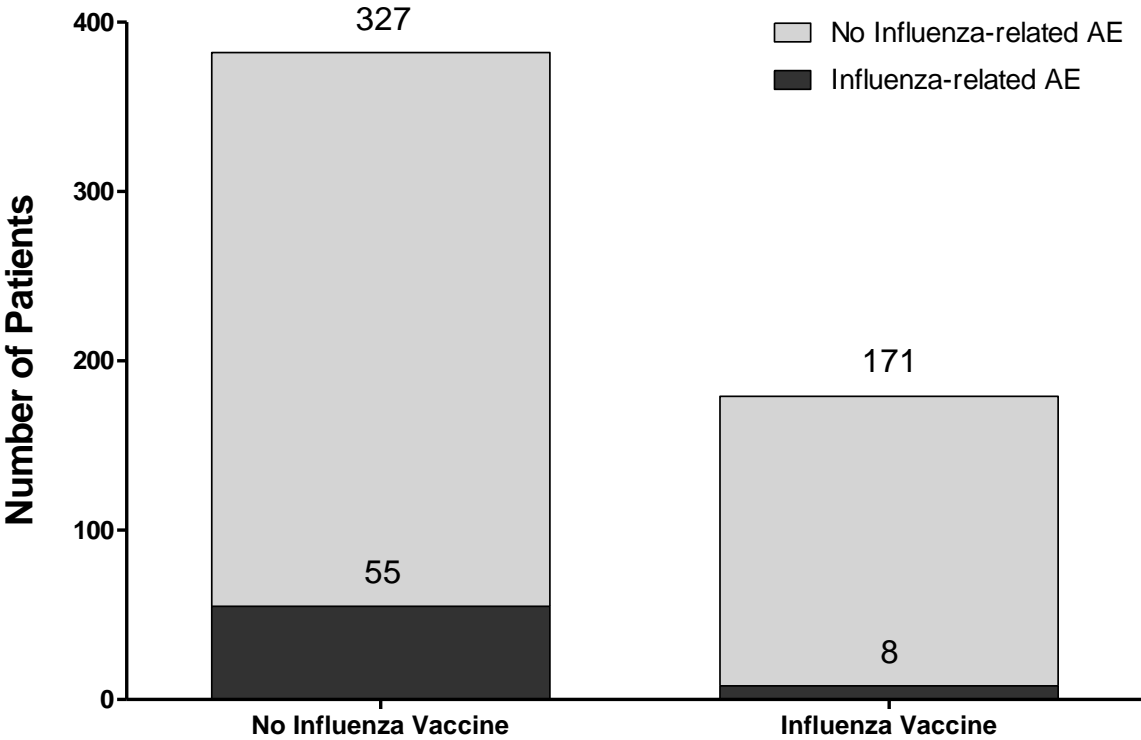

**Figure S3:** Mean change from baseline in Apoprotein A-1 (A), cholesterol (B) and HDL (C) for each treatment group

**A**

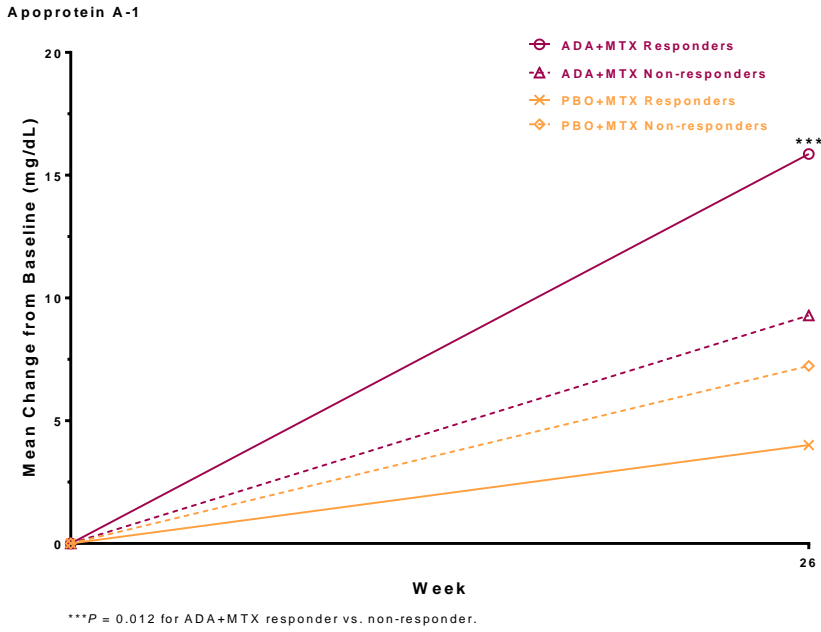

**B**

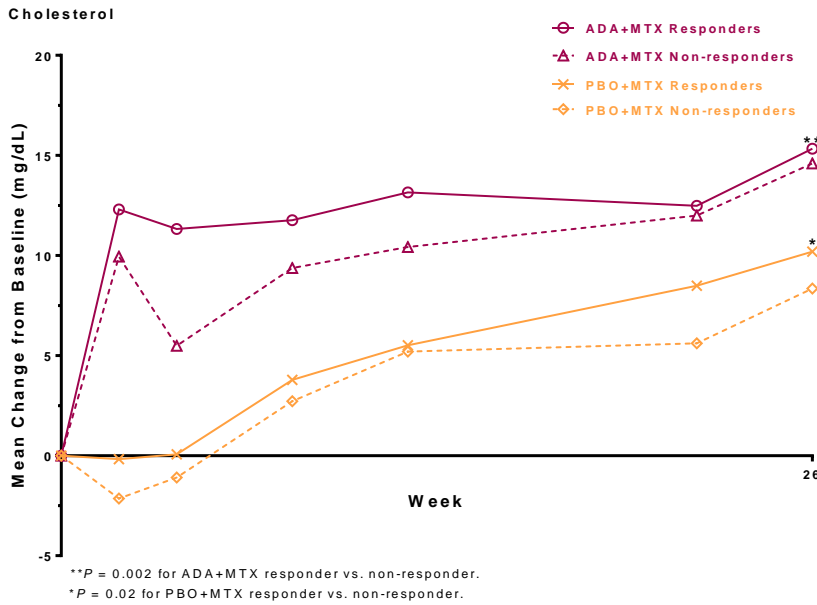

C

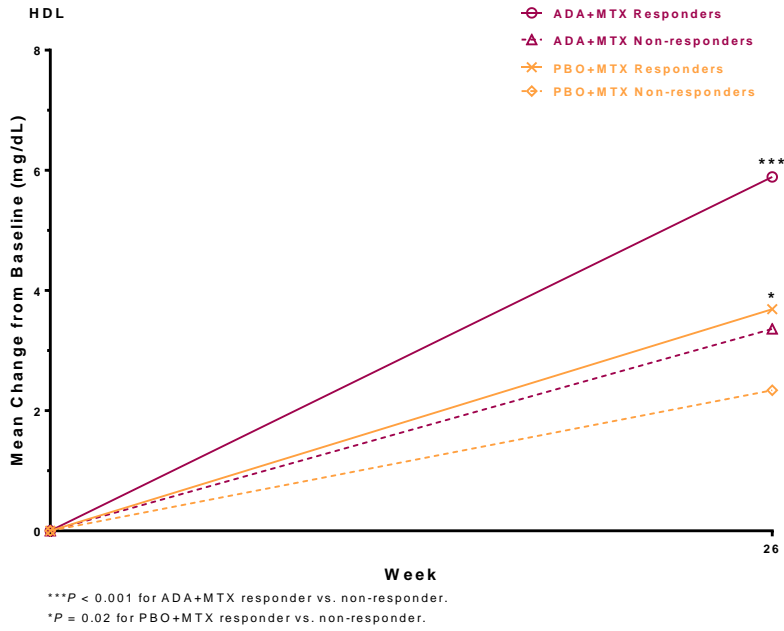

Supplement: annrheumdis-2016-209322supp.pdf [file annrheumdis-2016-209322supp.pdf]
